# Supplementary material
Source: PubMed Central journal article supplement (PMC8054595)
Supplement: JGMED20009391.pdf [file JGMED20009391.pdf]

George KE, Gressel GM, Ogburn T, Woodland MB, Banks E. Surveying obstetrics and gynecology residents about their residency applications, interviews, and ranking. *J Grad Med Educ.* 2021;13(2):257–265.

## Supplementary Data

### 2018 CREOG Exam Survey: Interviewing Process

1. Current year of residency:
  - a. PGY1
  - b. PGY2
  - c. PGY3
  - d. PGY4
2. Gender Identification
  - a. Male
  - b. Female
  - c. Transgender Female
  - d. Transgender Male
  - e. Gender Variant/Non-Conforming
  - f. Prefer not to answer
3. Are you Hispanic, Latino, or of Spanish origin?
  - a. Yes
  - b. No
  - c. Prefer not to answer
4. How would you describe yourself?
  - a. American Indian or Alaska Native
  - b. Asian
  - c. Black or African American
  - d. Native Hawaiian or Pacific Islander
  - e. White
  - f. Two or more races
  - g. Prefer not to answer
5. Marital status
  - a. Single (never married)

George KE, Gressel GM, Ogburn T, Woodland MB, Banks E. Surveying obstetrics and gynecology residents about their residency applications, interviews, and ranking. *J Grad Med Educ.* 2021;13(2):257–265.

- b. Married/or in a domestic relationship
  - c. Separated
  - d. divorced
  - e. Widowed
  - f. Prefer not to answer
6. How many children do you have?
- a. 0
  - b. 1
  - c. 2
  - d. 3
  - e. 4+
7. In which CREOG Region is your residency program?
- a. Region 1 (CT, MA, ME, NH, NY, RI, VT, Newfoundland, Nova Scotia, Quebec)
  - b. Region 2 (DE, IN, KY, MI, NJ, OH, PA, Ontario)
  - c. Region 3 (DC, FL, GA, MD, NC, SC, VA, WV, Puerto Rico)
  - d. Region 4 (AL, AR, IL, IA, KS, LA, MN, MS, MO, NE, OK, TN, TX, WI, Saskatchewan, Manitoba)
  - e. Region 5 (Armed Forces, AZ, CA, CO, HI, NV, NM, OR, UT, WA, Alberta, British Columbia)
8. Is your residency program primarily?
- a. University-based
  - b. Community-based
  - c. Both University – and Community-based
  - d. Military
9. Did you participate in the couples match?
- a. Yes
  - b. No
10. How many Ob/Gyn residency programs did you apply to?
- a. 1-10
  - b. 11-20

George KE, Gressel GM, Ogburn T, Woodland MB, Banks E. Surveying obstetrics and gynecology residents about their residency applications, interviews, and ranking. *J Grad Med Educ.* 2021;13(2):257–265.

- c. 21-30
  - d. 31-40
  - e. more than 40
11. How many Ob/Gyn interview invitations did you receive?
- a. 1-3
  - b. 4-6
  - c. 7-10
  - d. more than 10
12. How many Ob/Gyn interviews did you attend/participate
- a. 1-3
  - b. 4-6
  - c. 7-10
  - d. More than 10
13. Were any interviews conducted virtually (e.g. Skype, Facetime, etc
- a. Yes
  - b. No
  - c. I don't know
14. If yes, how many?
- a. 1-3
  - b. 4-6
15. Would you have chosen a program based only on a virtual interview?
- a. Yes
  - b. No
  - c. I don't know
16. In what range was your United States Medical Licensing Examination (USMLE) Step 1 Score
- a. Under 200
  - b. 200-230
  - c. 231-250
  - d. Over 250

George KE, Gressel GM, Ogburn T, Woodland MB, Banks E. Surveying obstetrics and gynecology residents about their residency applications, interviews, and ranking. *J Grad Med Educ.* 2021;13(2):257–265.

- e. Prefer not to answer
17. Did you take the USMLE Step 1 more than once
- a. Yes
  - b. No
  - c. Prefer not to answer
18. Did you receive honor in your Ob/Gyn during your 3<sup>rd</sup> year obstetrics rotation
- a. Yes
  - b. No
  - c. Prefer not to answer
19. Which of the following best describes your match experience?
- a. I matched in my top 5 choices
  - b. I matched in my top 10 choices
  - c. I matched below my top 10 choices
  - d. Can't remember
  - e. Prefer not to answer
20. What were the most important factors you considered when APPLYING to programs? (Choose top 4)
- a. Location
  - b. Reputation of the institution
  - c. Advice from a faculty advisor
  - d. Presence of fellowship programs
  - e. Absence of fellowship programs
  - f. Family friendly
  - g. Proximity to family and/or significant others
  - h. Availability to complete a 4<sup>th</sup> year medical rotation
  - i. Gynecologic procedural experience
  - j. Obstetrics procedural experience
  - k. Global Health opportunities
  - l. Academic rigor (i.e. preparation for fellowship, publications, or academic position)

George KE, Gressel GM, Ogburn T, Woodland MB, Banks E. Surveying obstetrics and gynecology residents about their residency applications, interviews, and ranking. *J Grad Med Educ.* 2021;13(2):257–265.

m. Availability of elective rotations

21. What were the most important factors you considered when SELECTING a program?

(Choose top 4)

- a. Location
- b. Family friendly
- c. Availability to complete a 4<sup>th</sup> year medical rotation
- d. Gynecologic procedural experience
- e. Obstetrics procedural experience
- f. Global Health opportunities
- g. Academic Rigor (i.e. preparation for fellowship, publications or academic position)
- h. Availability of elective rotations
- i. Residency culture fit

22. What were the most important resources to help you learn about each program?

(Choose top 4)

- a. Interview day
- b. Program website
- c. Meeting with faculty
- d. Meeting with residents
- e. Program social event
- f. Consulting with your medical school advisor
- g. Consulting with your peers
- h. GME Track Website
- i. ACGME Website
- j. APGO Residency Directory
- k. ACOG Career Fair
